# Supplementary material
Source: PubMed Central journal article supplement (PMC5957270)
Supplement: NIHMS77735-supplement-Supporting_Information.pdf [file NIHMS77735-supplement-Supporting_Information.pdf]

## SUPPORTING INFORMATION

for

### Quantifying effects of biodiversity on ecosystem functioning across times and places

Authors: Forest Isbell, Jane Cowles, Laura E. Dee, Michel Loreau, Peter B. Reich,  
Andrew Gonzalez, Andy Hector, Bernhard Schmid

**Annotated R script for applying the additive partition to the hypothetical cases provided in Tables 1 and 2.** Lines to be run in R are shown in *bold italic small font*.

The R script on the next two pages first defines functions for quantifying the complementarity effect (*funcCE*) and the selection effect (*funcSE*), as quantified by Loreau and Hector (Loreau & Hector 2001). Second, a function named *fune* is defined that requires a data frame (*df*) containing five columns: (1) time, (2) place, (3) species, (4) Y, which is the species-specific levels of ecosystem functioning in mixture, and (5) M, which is the species-specific levels of ecosystem functioning in monoculture; and that returns a data frame with quantities for each of the biodiversity effects shown in Table 2. Note that this function would need to be modified for cases where there are more than two times, places, or species. For example, the expected relative yield assumes two species, planted in equal proportions and the quantification of insurance effects assumes two times and two places. Third, the *fune* function is applied to each of the two cases shown in Table 1 and each of the six cases shown in Table 2.

#Define functions

*library(plyr)*

*funcCE <- function(df) {return(data.frame(CE = mean(df\$M)\*mean(df\$chRY)\*nrow(df)))}*

*funcSE <- function(df) {return(data.frame(SE = cov(df\$M,df\$chRY)\*(nrow(df)-1)))}*

*fune <- function(df) {*

*#add columns to df that are needed for quantifying biodiversity effects*

*df\$RYo <- df\$Y/df\$M*

*df\$RYe <- 1/2*

*df\$chRY <- df\$RYo-df\$RYe*

*jdf <- aggregate.data.frame(df\$Y,by=list(df\$time,df\$place),sum)*

*names(jdf) <- c("time","place","Yo")*

*df <- merge(df,jdf,all.x=T)*

*df\$p <- df\$Y/df\$Yo*

*df\$chRYo <- df\$RYo-df\$p*

*df\$dp <- df\$p-df\$RYe*

*jdf <- aggregate.data.frame(df\$M,by=list(df\$species,df\$time),mean)*

*names(jdf) <- c("species","time","Mst")*

*df <- merge(df,jdf,all.x=T)*

*jdf <- aggregate.data.frame(df\$M,by=list(df\$species,df\$place),mean)*

*names(jdf) <- c("species","place","Msp")*

*df <- merge(df,jdf,all.x=T)*

*jdf <- aggregate.data.frame(df\$dp,by=list(df\$species,df\$time),mean)*

*names(jdf) <- c("species","time","pst")*

*df <- merge(df,jdf,all.x=T)*

*jdf <- aggregate.data.frame(df\$dp,by=list(df\$species,df\$place),mean)*

*names(jdf) <- c("species","place","psp")*

*df <- merge(df,jdf,all.x=T)*

*df <- df[order(df\$time,df\$place,df\$species),]*

*return(data.frame(*

*NBE = sum(df\$M\*df\$chRY), #net biodiversity effect*

*TC = mean(df\$M)\*mean(df\$chRY)\*nrow(df), #total complementarity effect*

*TC2 = sum(ddply(df, .(), funcCE)\$CE), #this is a different way to quantify TC*

*total.se = cov(df\$M,df\$chRY)\*(nrow(df)-1), #total selection effect*

*total.se2 = sum(ddply(df, .(), funcSE)\$SE), #this is a different way to quantify total.se*

*NO = cov(df\$M,df\$chRYo)\*(nrow(df)-1), #nonrandom overyielding effect*

*IE = cov(df\$M,df\$dp)\*(nrow(df)-1), #total insurance effect: IE = AS+TI+SI+ST*

*AS = sum((tapply(df\$M,df\$species,mean)-mean(df\$M))\*(tapply(df\$dp,df\$species,mean)-*  
*mean(df\$dp)))\*2\*2, #average selection effect*

*TI = sum((as.vector(tapply(df\$M,list(df\$species,df\$time),mean))-*

*rep(tapply(df\$M,df\$species,mean),2))\*(as.vector(tapply(df\$dp,list(df\$species,df\$time),mea*  
*n))-rep(tapply(df\$dp,df\$species,mean),2))\*2, #temporal insurance effect*

*SI = sum((as.vector(tapply(df\$M,list(df\$species,df\$place),mean))-*

*rep(tapply(df\$M,df\$species,mean),2))\*(as.vector(tapply(df\$dp,list(df\$species,df\$place),me*  
*an))-rep(tapply(df\$dp,df\$species,mean),2))\*2, #spatial insurance effect*

*ST = sum((df\$M-df\$Mst-*

*df\$Msp+rep(tapply(df\$M,df\$species,mean),4)+rep(mean(df\$M),8))\*(df\$dp-df\$pst-*  
*df\$psp+rep(tapply(df\$dp,df\$species,mean),4)+rep(mean(df\$dp),8))), #spatiotemporal*  
*insurance effect*

*local.ce = sum(ddply(df,.(time,place), funcCE)\$CE), #local complementarity effect*

*local.se = sum(ddply(df,.(time,place), funcSE)\$SE) #local selection effect*

*))}*

#Table 1A

***fune(data.frame(time=c(1,1,1,1), place=c(1,1,2,2), species=c(1,2,1,2), M=c(200,200,100,100), Y=c(200,200,0,0)))[,c(1,2,4,12,13)]***

#Table 1B

***fune(data.frame(time=c(1,1,1,1), place=c(1,1,2,2), species=c(1,2,1,2), M=c(50,350,0.44,1), Y=c(8.15,291.7,0.88,0)))[,c(1,2,4,12,13)]***

#Case 1 in Table 2

***fune(data.frame(time=c(1,1,1,1,2,2,2,2), place=c(1,1,2,2,1,1,2,2), species=c(1,2,1,2,1,2,1,2), M=c(100,50,100,50,100,50,100,50), Y=c(100,0,100,0,100,0,100,0))***

#Case 2 in Table 2

***fune(data.frame(time=c(1,1,1,1,2,2,2,2), place=c(1,1,2,2,1,1,2,2), species=c(1,2,1,2,1,2,1,2), M=c(100,50,100,50,50,100,50,100), Y=c(100,0,100,0,0,100,0,100))***

#Case 3 in Table 2

***fune(data.frame(time=c(1,1,1,1,2,2,2,2), place=c(1,1,2,2,1,1,2,2), species=c(1,2,1,2,1,2,1,2), M=c(100,50,50,100,100,50,50,100), Y=c(100,0,0,100,100,0,0,100))***

#Case 4 in Table 2

***fune(data.frame(time=c(1,1,1,1,2,2,2,2), place=c(1,1,2,2,1,1,2,2), species=c(1,2,1,2,1,2,1,2), M=c(100,50,50,100,50,100,100,50), Y=c(100,0,0,100,0,100,100,0))***

#Case 5 in Table 2

***fune(data.frame(time=c(1,1,1,1,2,2,2,2), place=c(1,1,2,2,1,1,2,2), species=c(1,2,1,2,1,2,1,2), M=c(75,75,75,75,75,75,75,75), Y=c(50,50,50,50,50,50,50,50))***

#Case 6 in Table 2

***fune(data.frame(time=c(1,1,1,1,2,2,2,2), place=c(1,1,2,2,1,1,2,2), species=c(1,2,1,2,1,2,1,2), M=c(100,50,100,50,100,50,100,50), Y=c(50,50,50,50,50,50,50,50))***
